# Supplementary material for: Contrasting the development of larval and adult body plans during the evolution of biphasic lifecycles in sea urchins
Source: PubMed Central journal article supplement (PMC11529275; doi:10.1242/dev.203015), 2024-10-28
Supplement: develop-151-203015-s1.pdf [file develop-151-203015-s1.pdf]

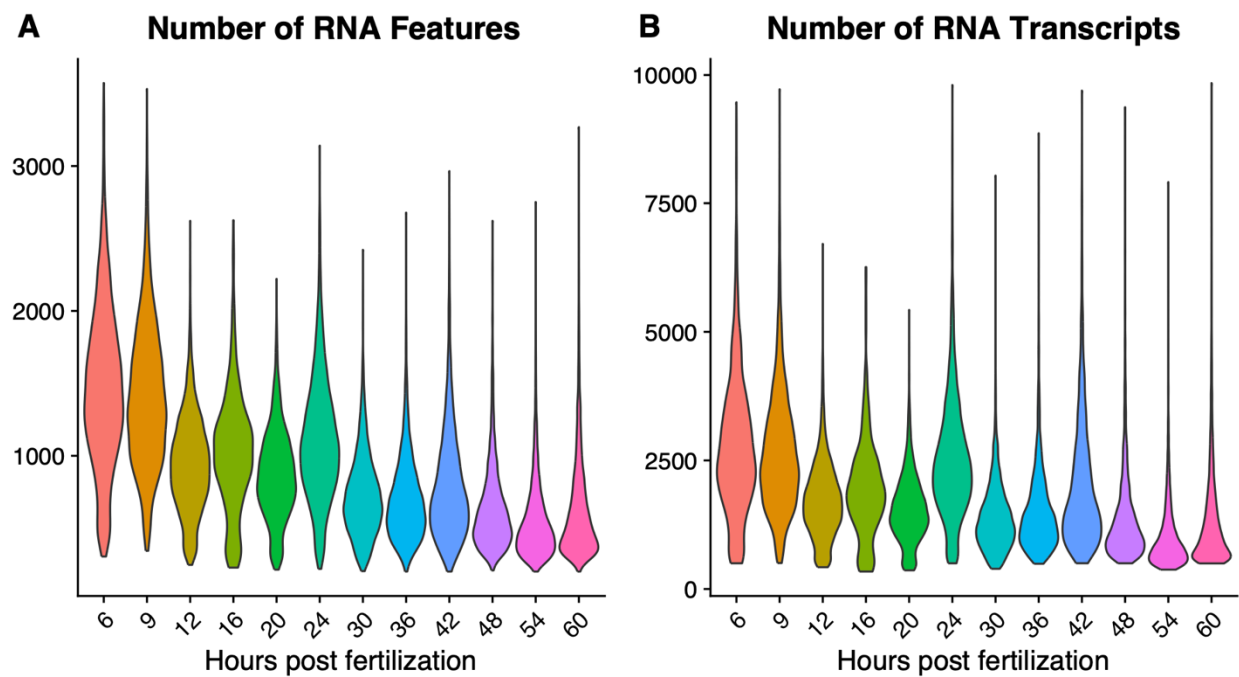

**Fig. S1. Quality control plots for the *He* scRNA-seq atlas.** (A) Violin plots showing the distribution of the number of RNA features (unique gene transcripts) in each cell for each sample time point. (B) Violin plots showing the distribution of the number of RNA transcripts in each cell for each sample time point.

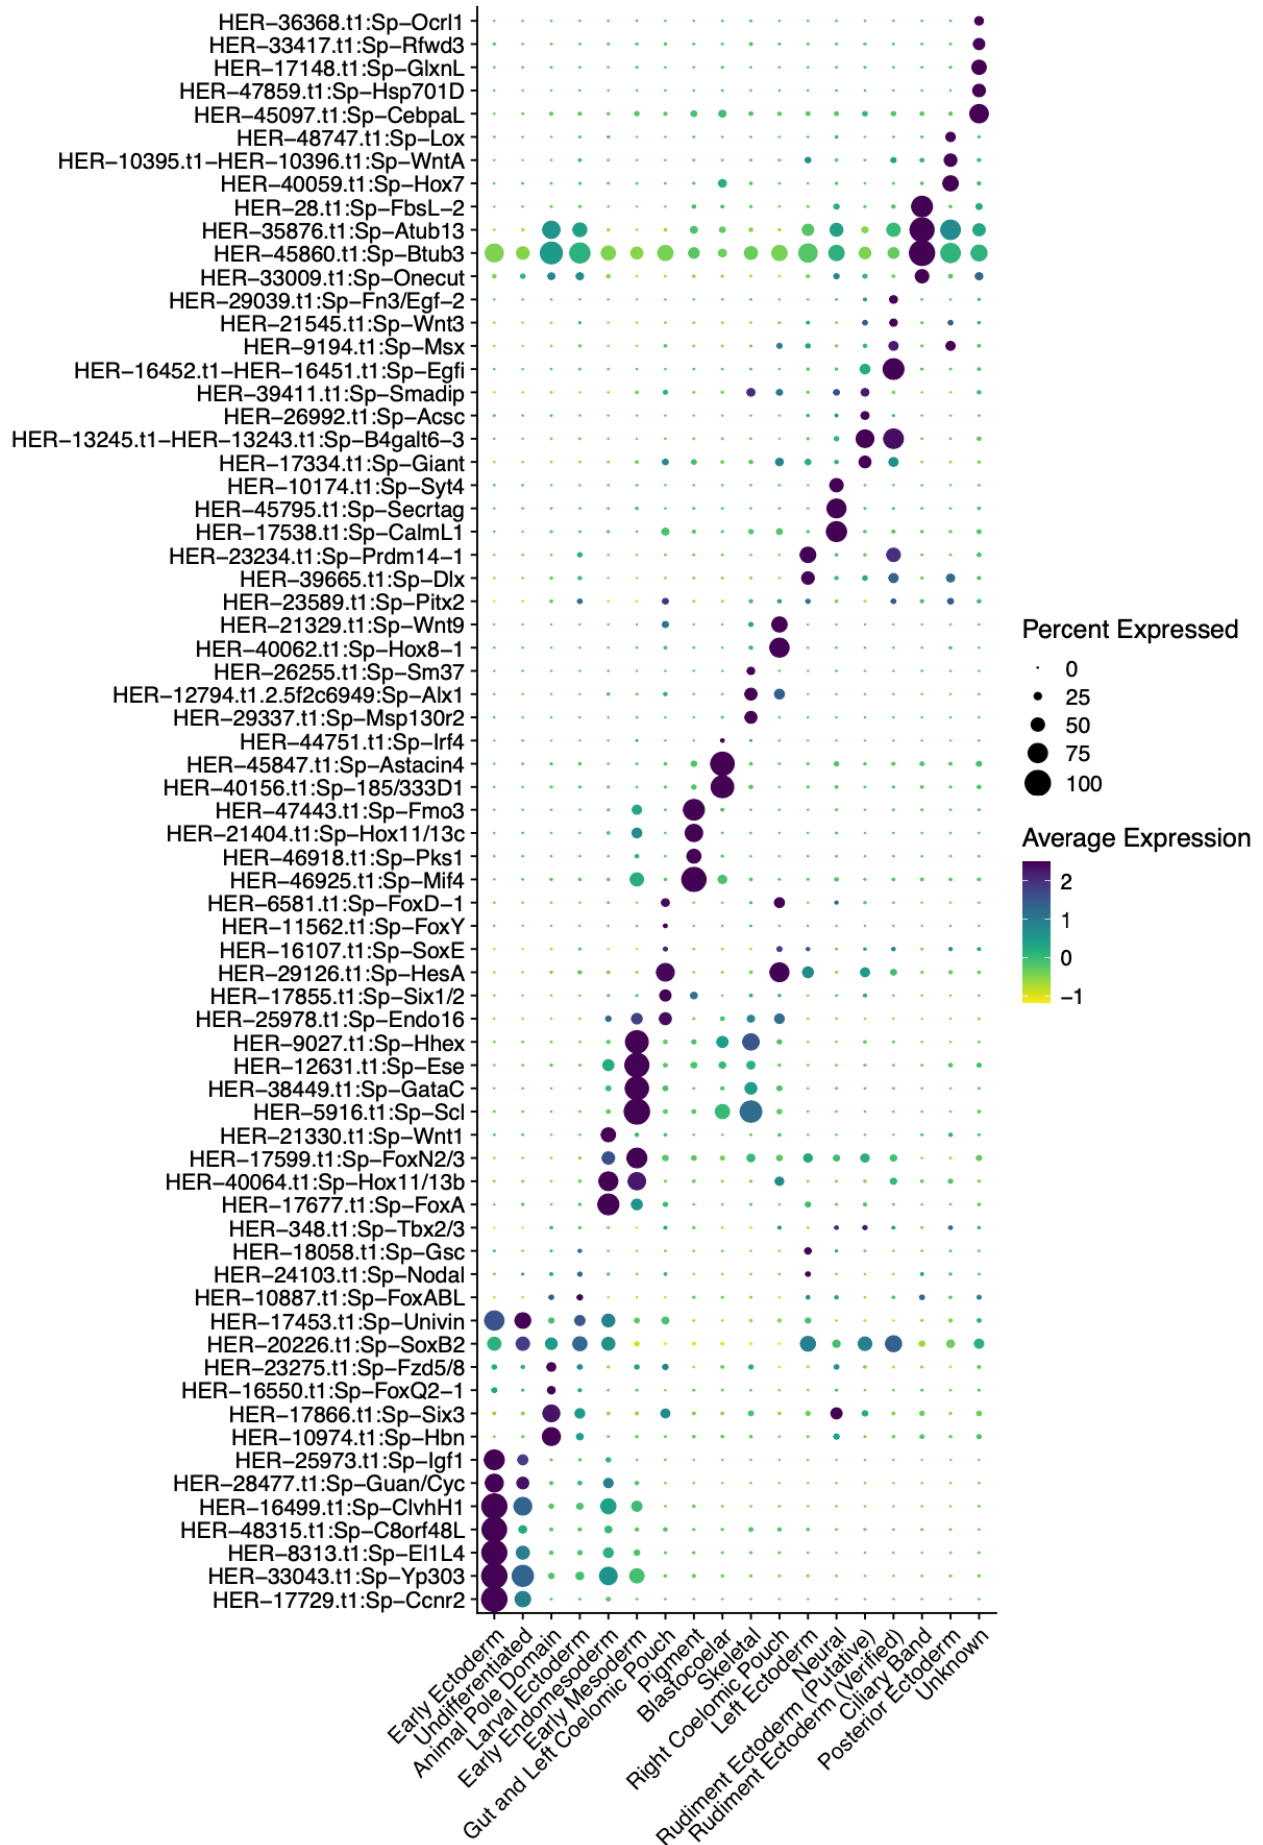

**Fig. S2. Dot plot of cell type marker gene expression patterns.** ~3-6 enriched marker genes (see Table S1) for each cell type in the scRNA-seq atlas were selected, and the average expression of the genes in each cell type was plotted.

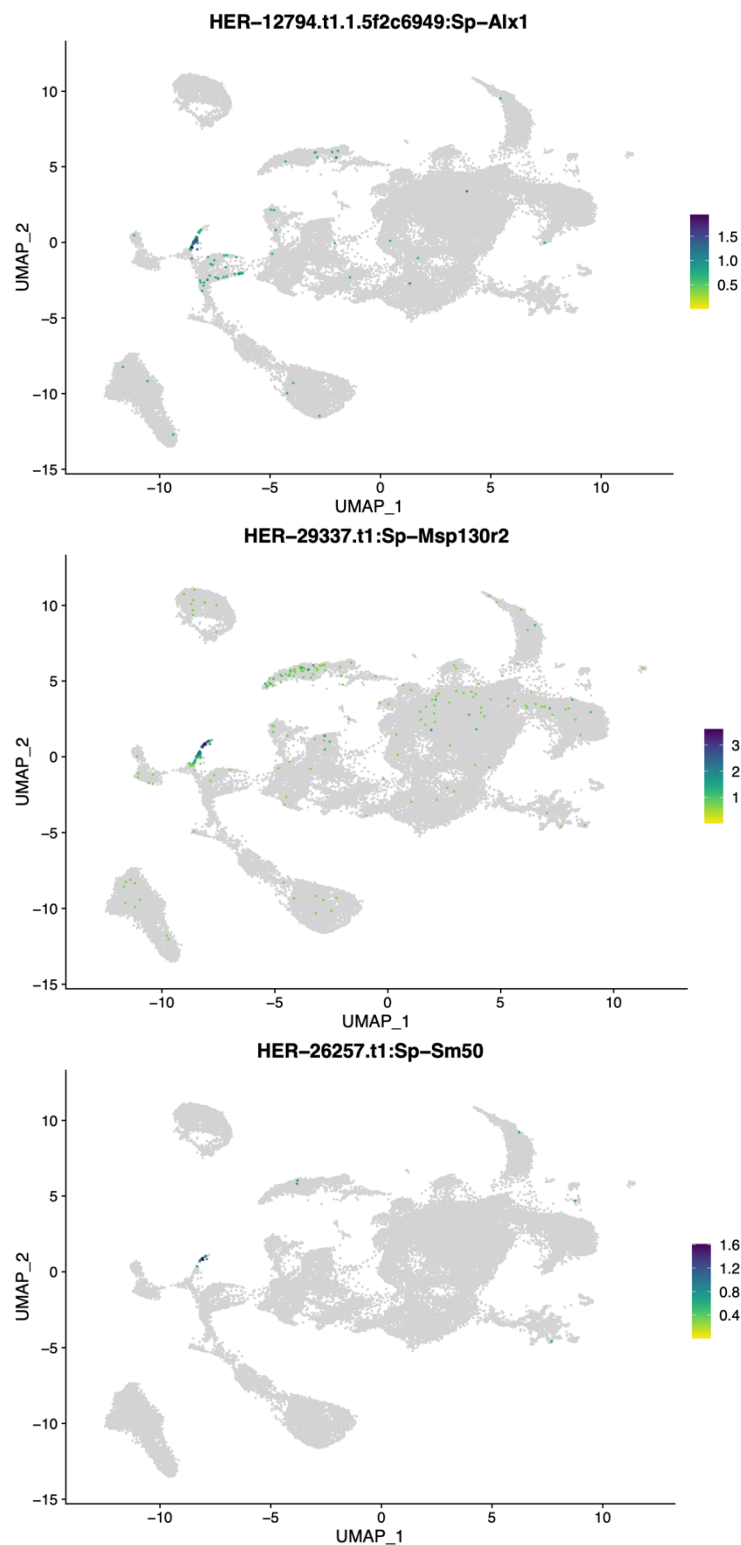

**Fig. S3. Expression patterns of skeletogenic cell marker genes.** These UMAPs show the expression patterns of three of the marker genes used to annotate the skeletogenic cell lineage in the *He* scRNA-seq atlas.



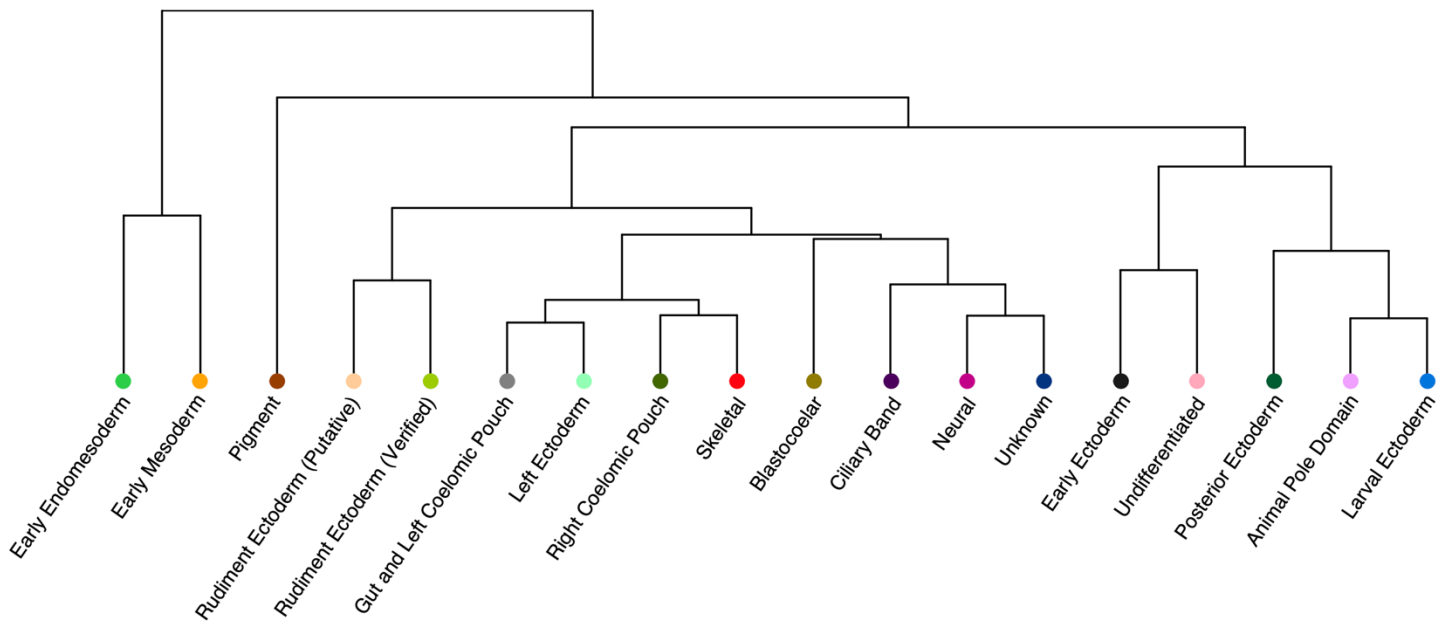

**Fig. S4. Phylogenetic tree of cell types in the scRNA-seq atlas.** This plot was generated using Seurat's BuildClusterTree function, which generates the phylogenetic tree using pairwise distances between the cell types in gene expression space.

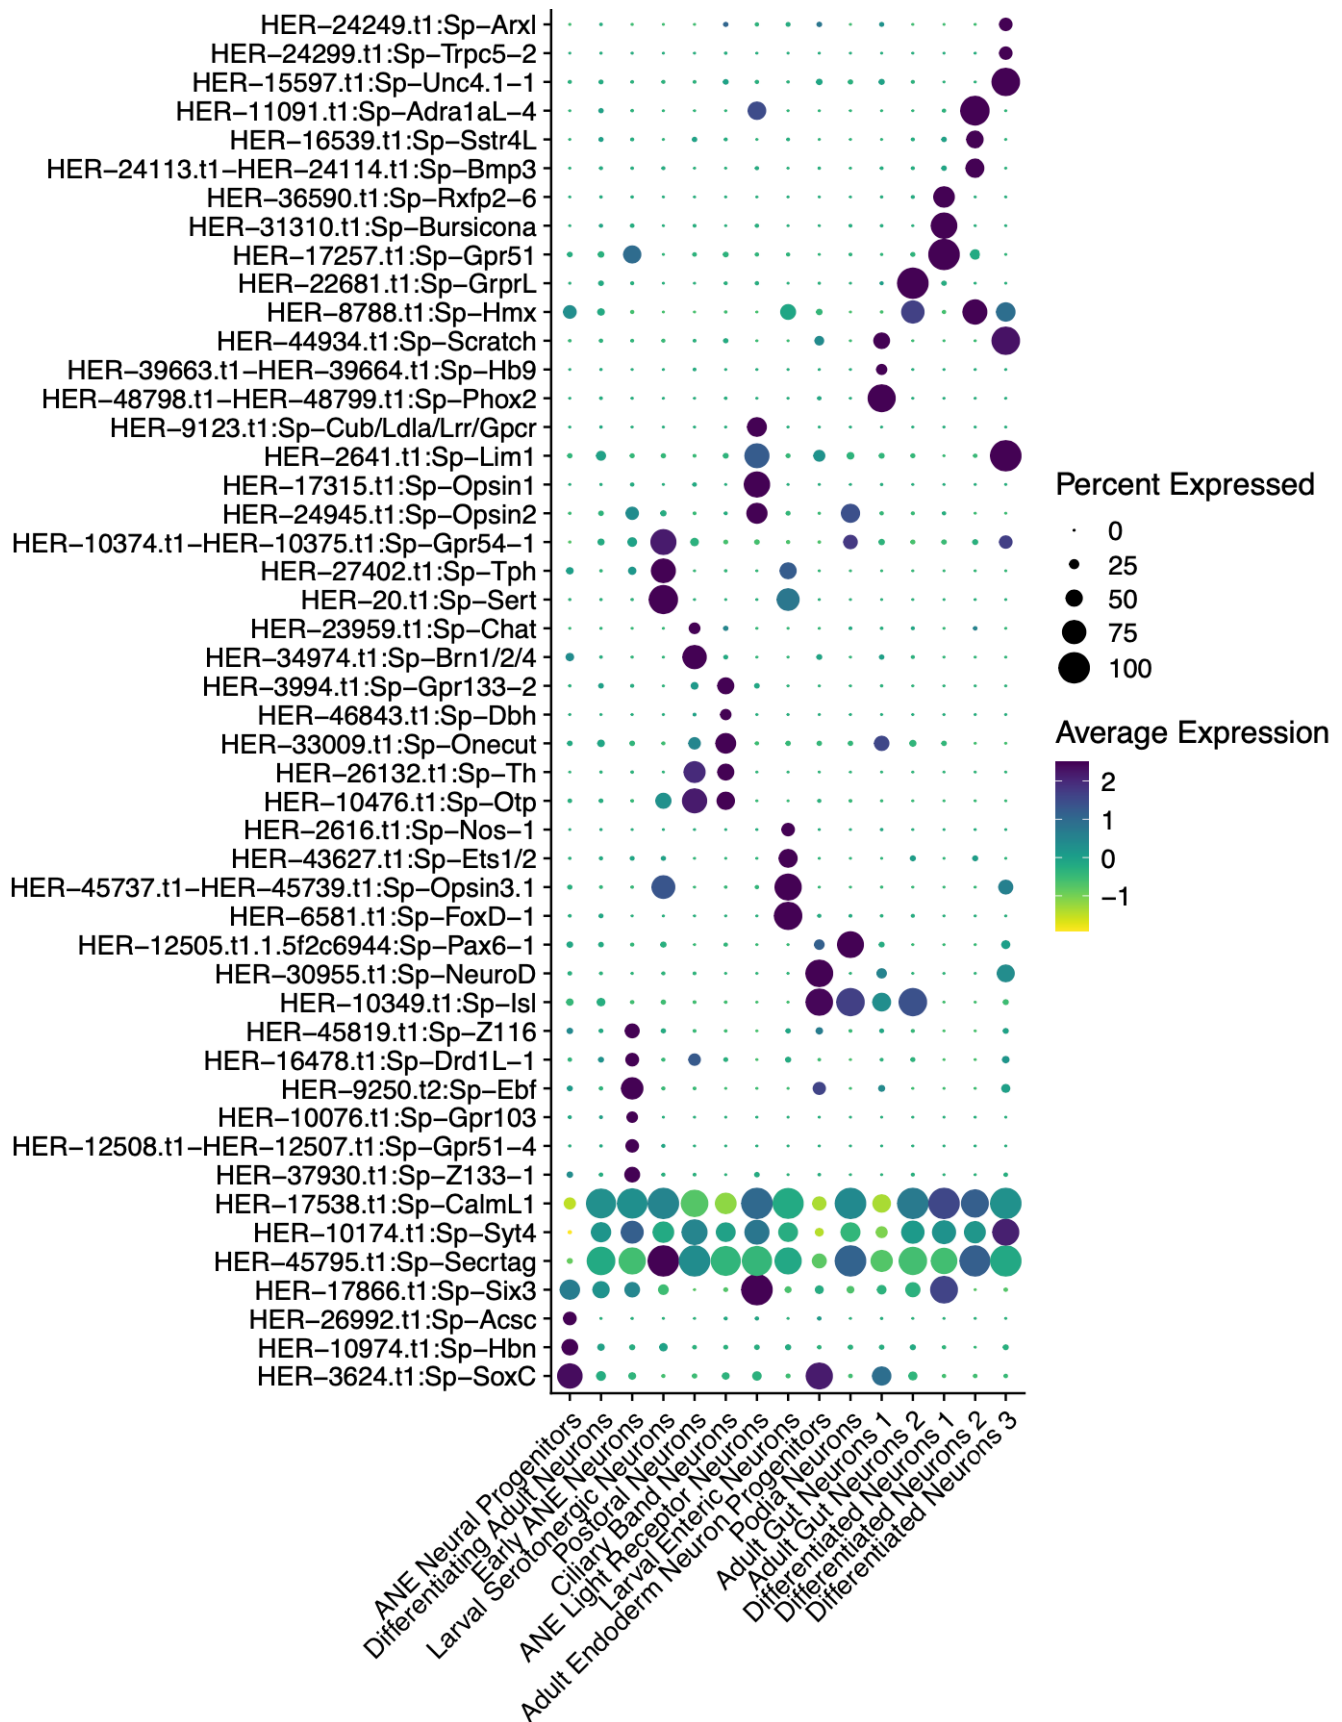

**Fig. S5. Dot plot of neural cell type marker gene expression patterns.** ~3-6 enriched marker genes (see Table S2) for each neural cell type in the scRNA-seq atlas were selected, and the average expression of the genes in each cell type was plotted.

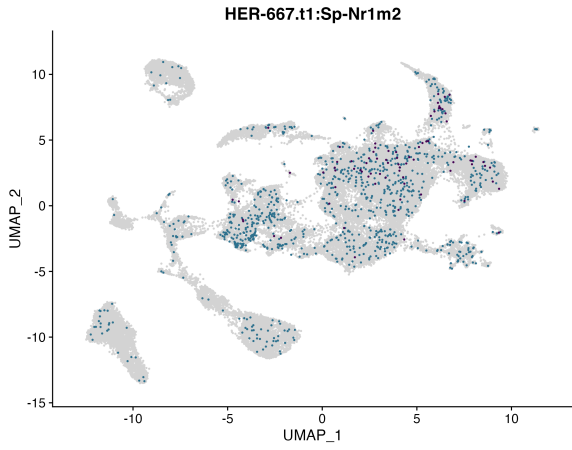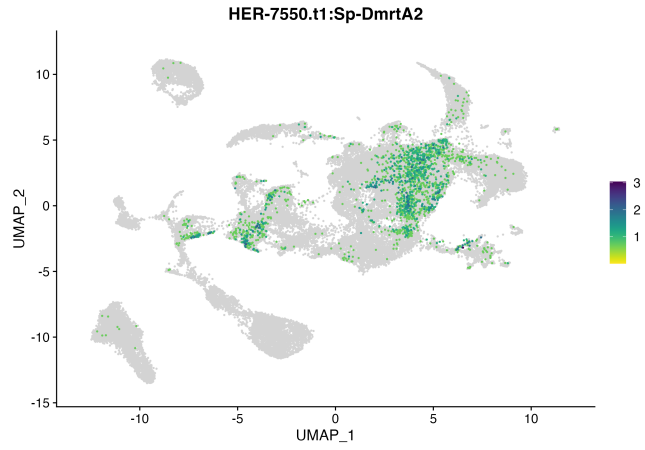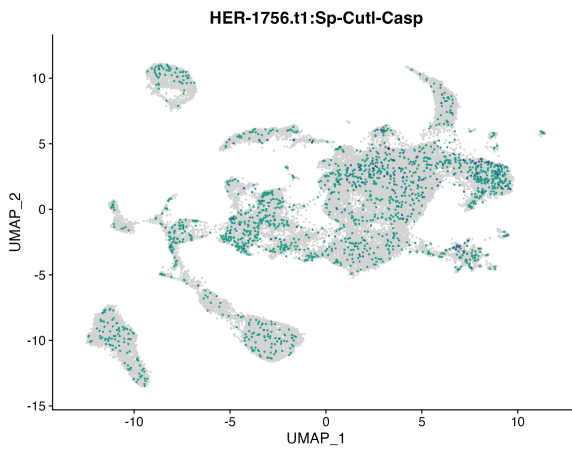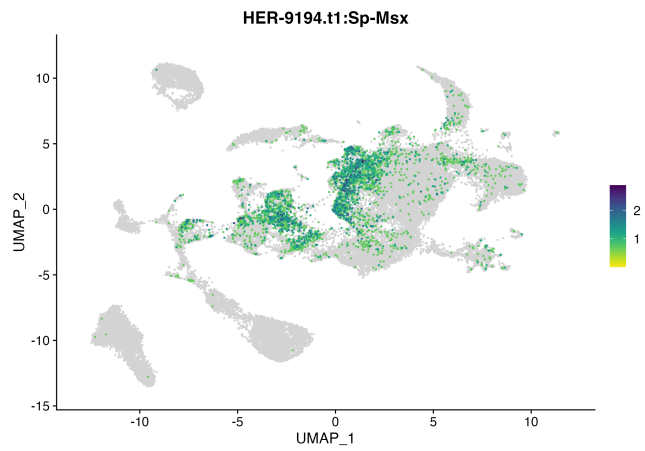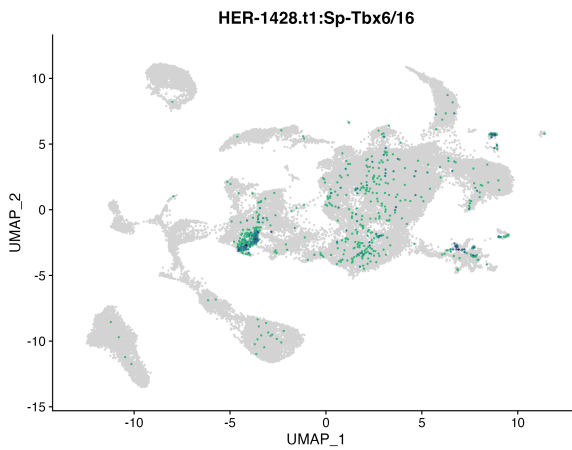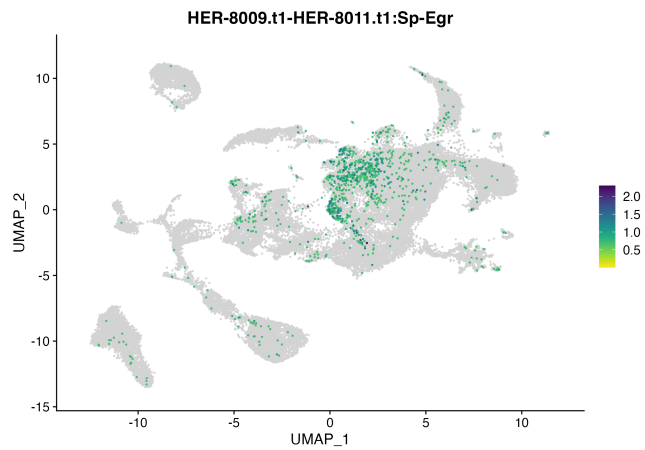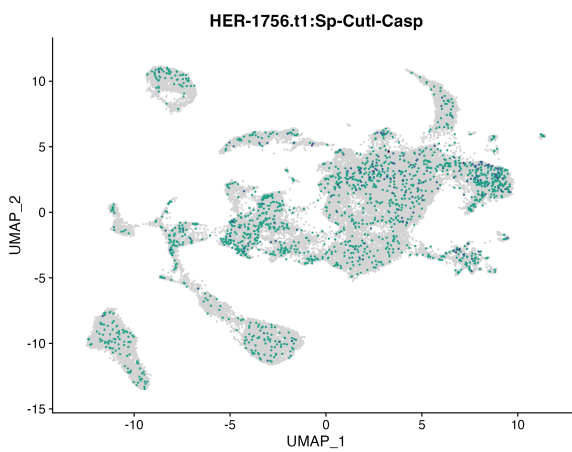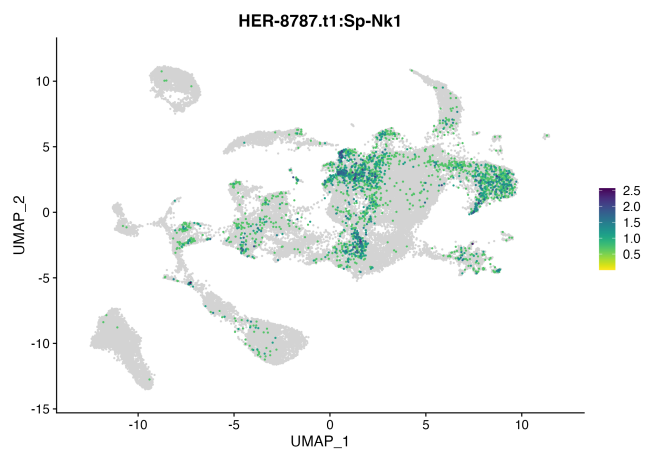

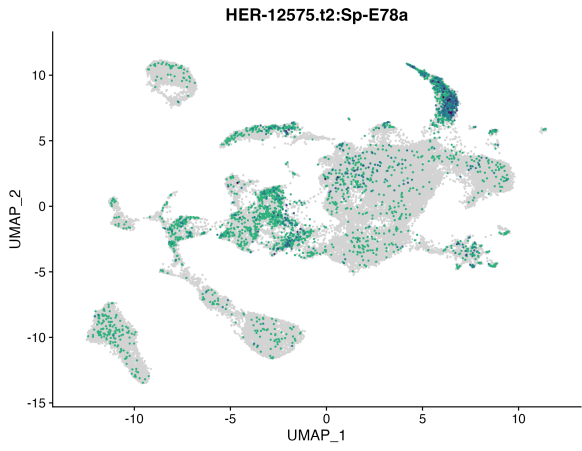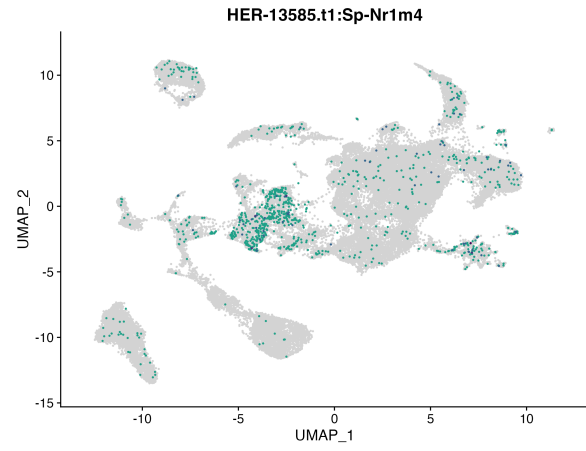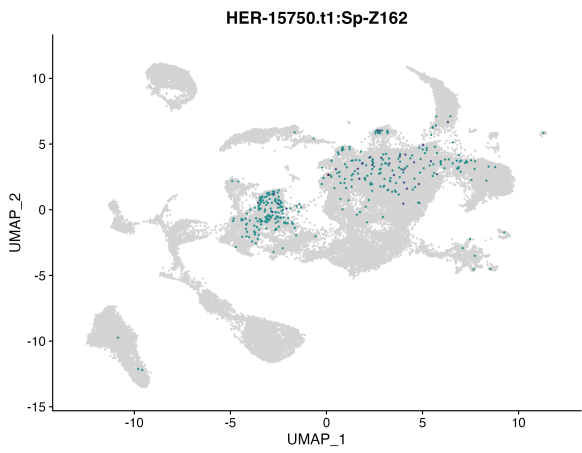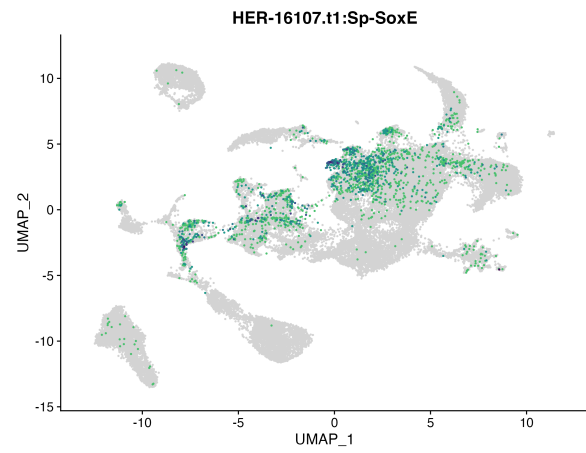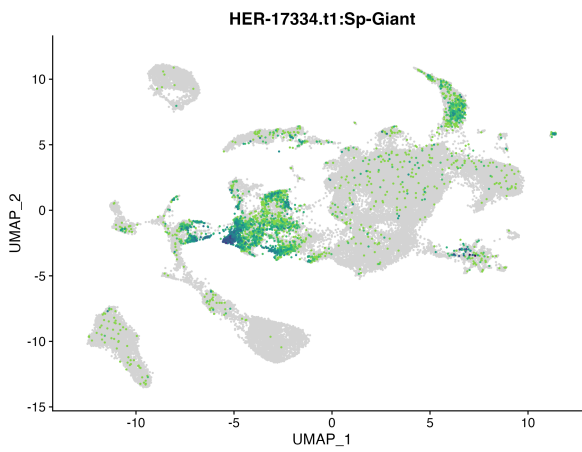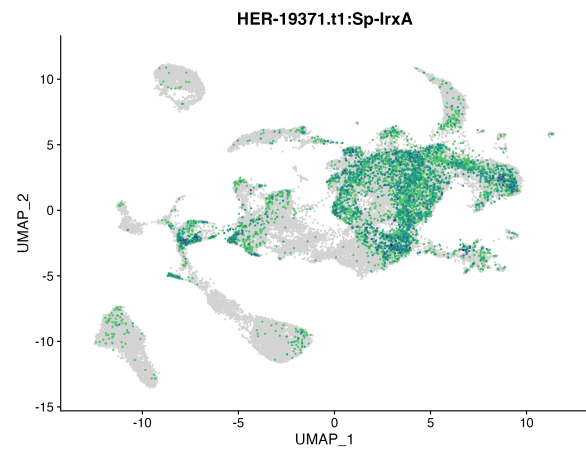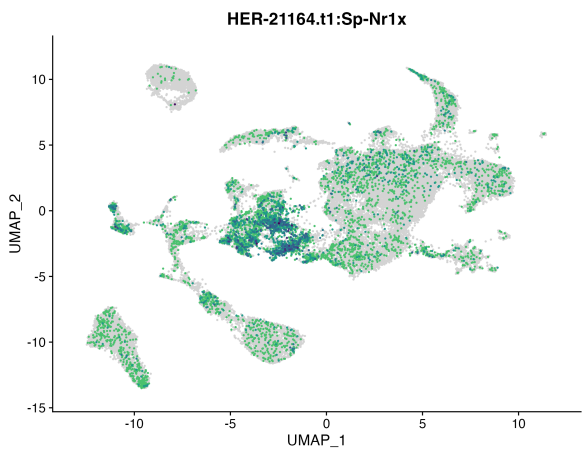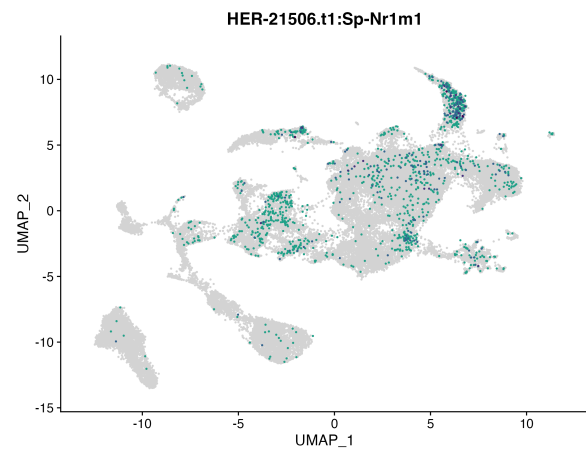

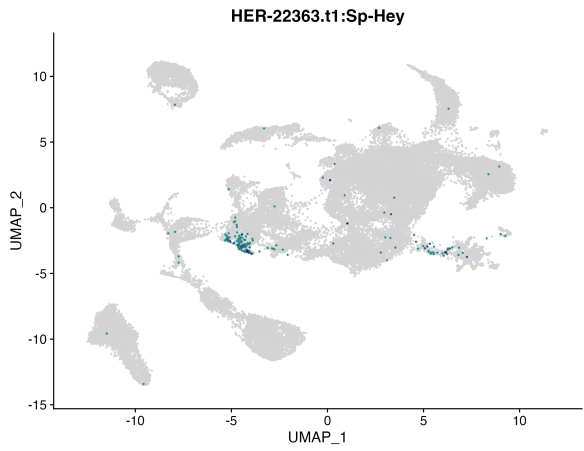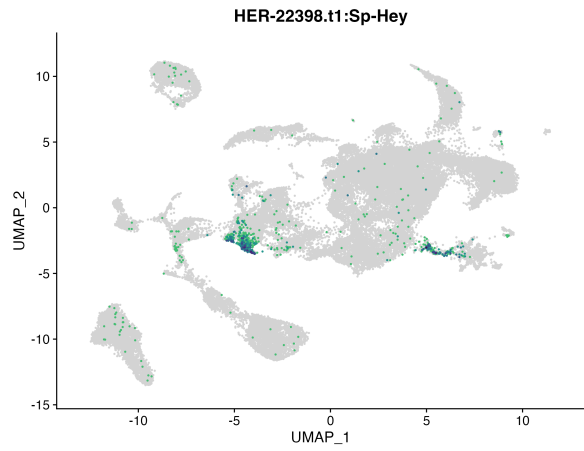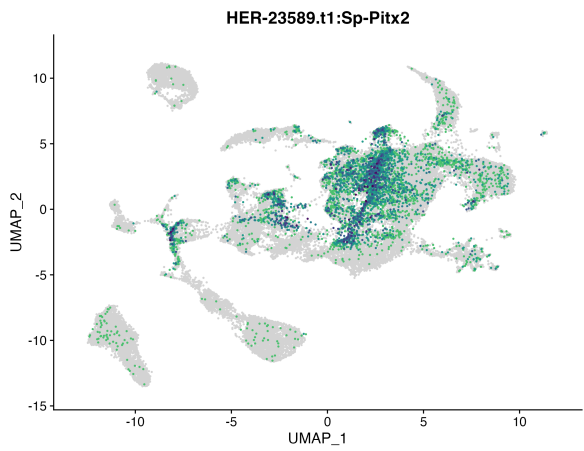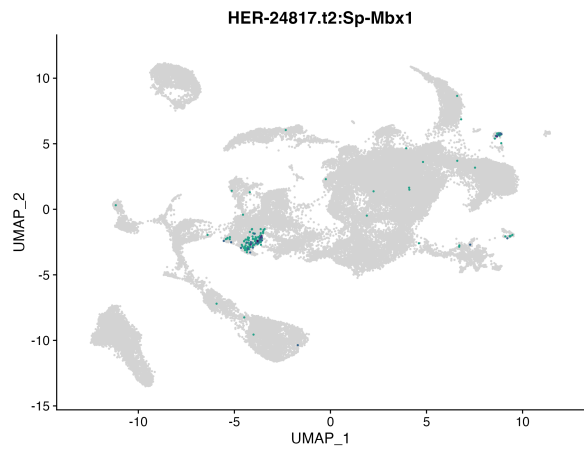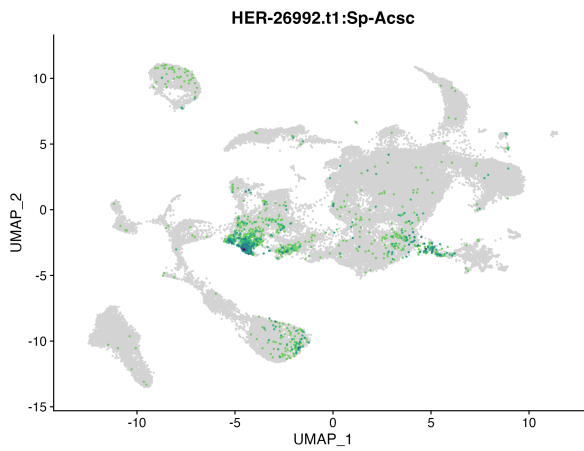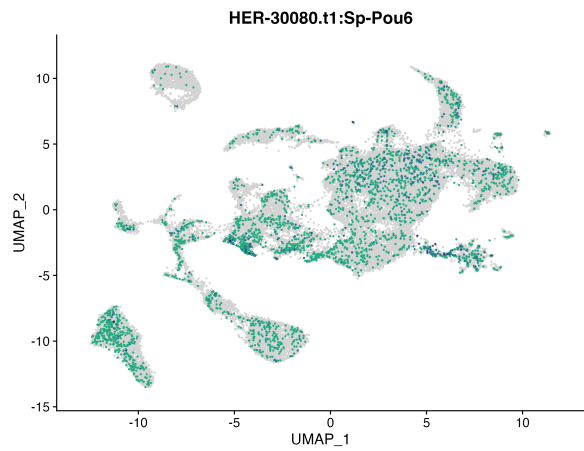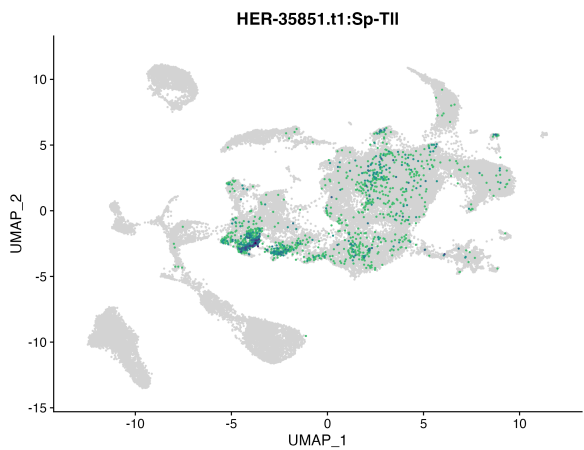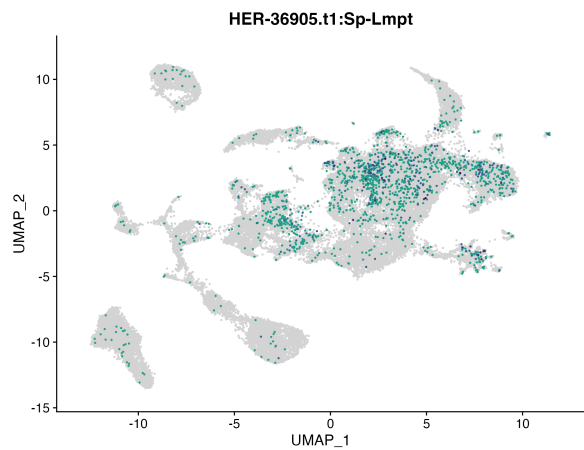

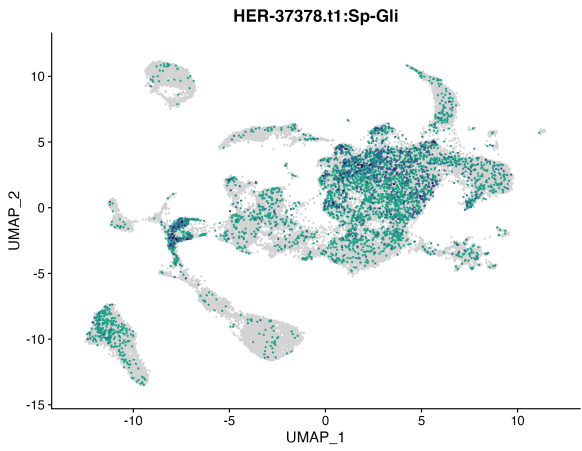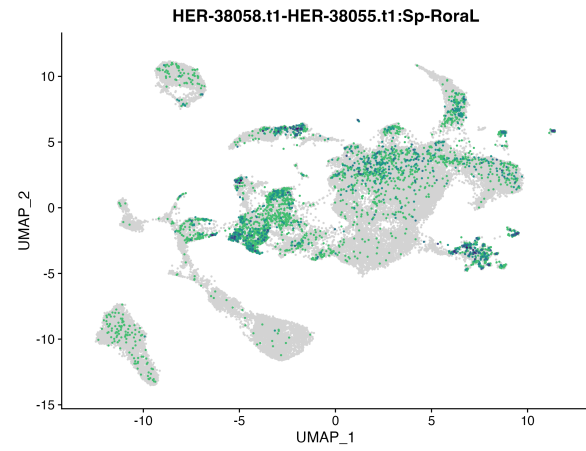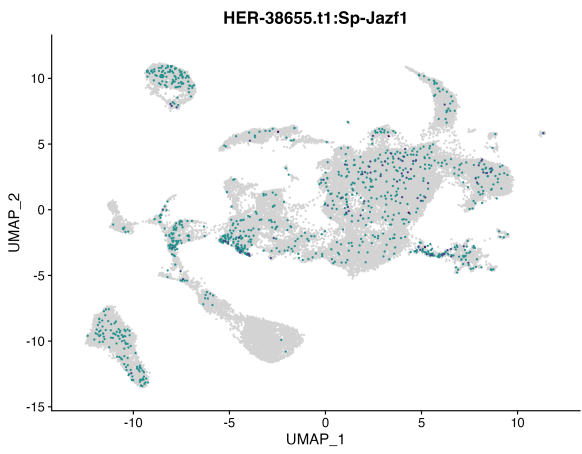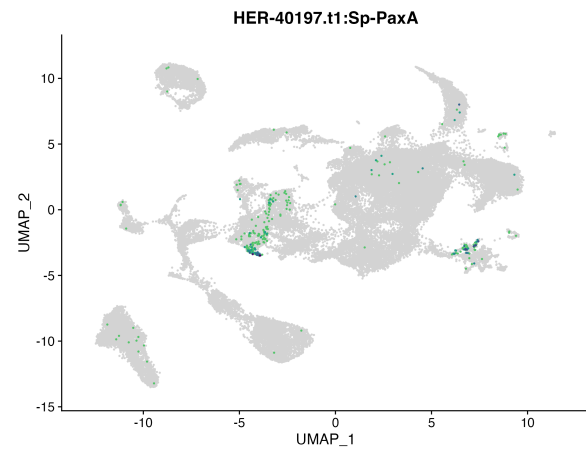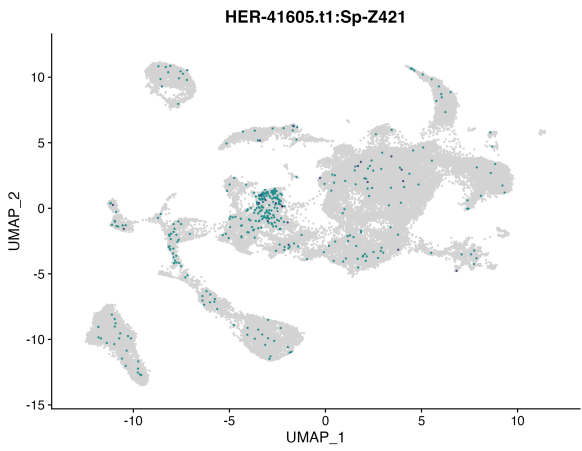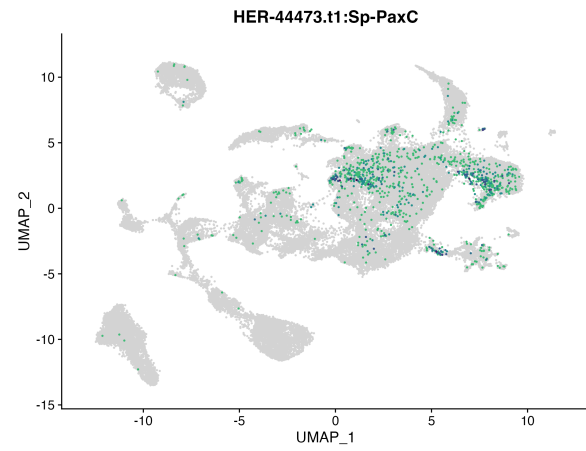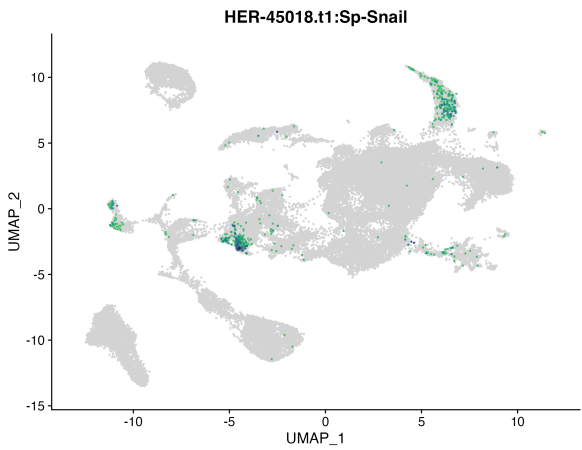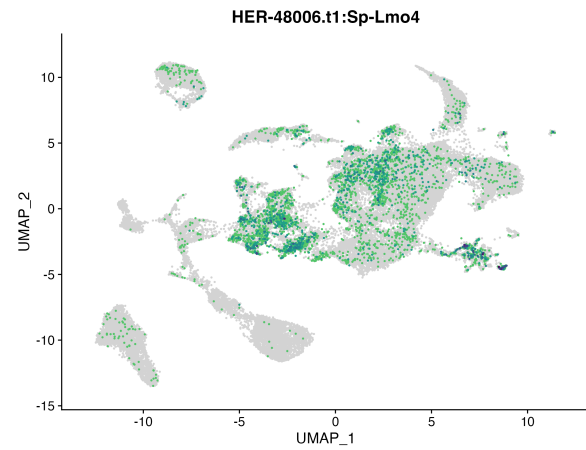

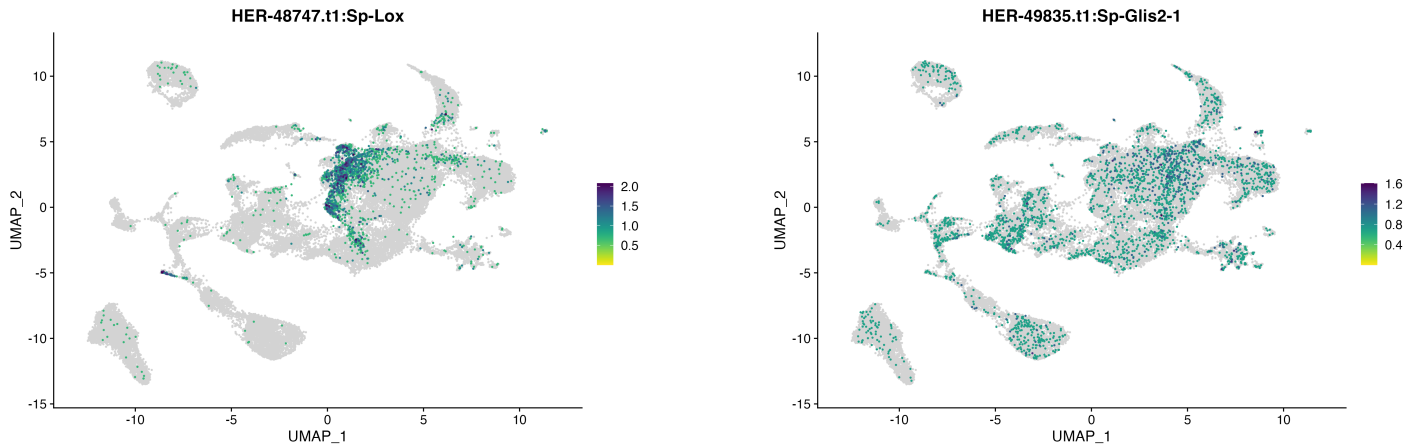

**Fig. S6. Expression patterns of the candidate transcription factors for adult rudiment development.** Each UMAP shows the scRNA-seq expression pattern of one of the 33 candidate transcription factors that was shown to be enriched in adult rudiment tissues (rudiment ectoderm and posterior ectoderm).



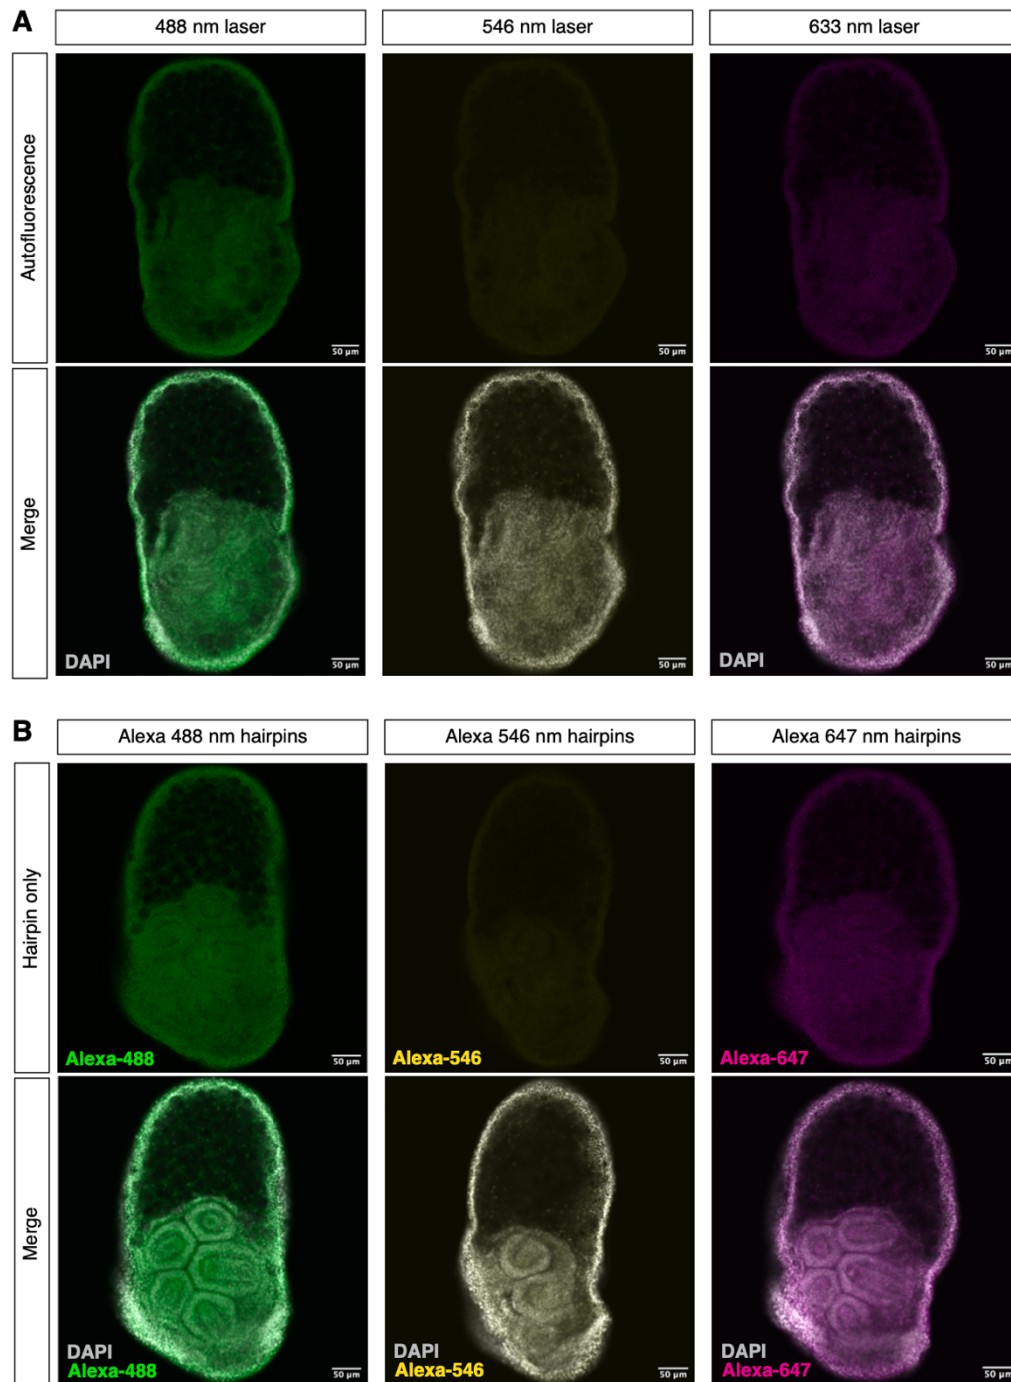

**Fig. S7. Control experiments to verify HCR specificity.** (A) HCR micrographs of 53 hpf *He* larvae that were incubated with no probes and no hairpins. (B) HCR micrographs of 53 hpf *He* larvae that were incubated with no probes. Neither condition resulted in localized fluorescent patterns, confirming the specificity of the probes used in this study.



**Table S1. Cell type marker genes and references for the full scRNA-seq atlas**

Available for download at

<https://journals.biologists.com/dev/article-lookup/doi/10.1242/dev.203015#supplementary-data>

**Table S2. Neural cell type marker genes and references for the neural-only scRNA-seq atlas**

Available for download at

<https://journals.biologists.com/dev/article-lookup/doi/10.1242/dev.203015#supplementary-data>

**Table S3. List of putative transcriptional regulators of adult rudiment development**

Available for download at

<https://journals.biologists.com/dev/article-lookup/doi/10.1242/dev.203015#supplementary-data>

**Table S4. Probe sequences used in HCR experiments**

Available for download at

<https://journals.biologists.com/dev/article-lookup/doi/10.1242/dev.203015#supplementary-data>

## References (for Supplemental Data)

- Allen, R. L., George, A. N., Miranda, E., Phillips, T. M., Crawford, J. M., Kiehart, D. P. and McClay, D. R. (2022). Wound repair in sea urchin larvae involves pigment cells and blastocoelar cells. *Developmental Biology*, 491, 56-65. <https://doi.org/10.1016/j.ydbio.2022.08.005>
- Anstrom, J. A., Chin, J. E., Leaf, D. S., Parks, A. L. and Raff, R. A. (1987). Localization and Expression of Msp130, a Primary Mesenchyme Lineage-Specific Cell-Surface Protein of the Sea-Urchin Embryo. *Development*, 101, 2, 255-265. <https://doi.org/10.1242/dev.101.2.255>
- Arenas-Mena, C., Cameron, A. R. and Davidson, E. H. (2000). Spatial expression of Hox cluster genes in the ontogeny of a sea urchin. *Development*, 127, 21, 4631-4643. <https://doi.org/10.1242/dev.127.21.4631>
- Arenas-Mena, C., Cameron, R. A. and Davidson, E. H. (2006). Hindgut specification and cell-adhesion functions of Sphox11/13b in the endoderm of the sea urchin embryo. *Dev Growth Differ*, 48, 7, 463-472. <https://doi.org/10.1111/j.1440-169x.2006.00883.x>
- Bellomonte, D., Di Bernardo, M., Russo, R., Caronia, G. and Spinelli, G. (1998). Highly restricted expression at the ectoderm–endoderm boundary of PIHbox 9, a sea urchin homeobox gene related to the human HB9 gene. *Mech Develop*, 74, 1-2, 185-188. [https://doi.org/10.1016/S0925-4773\(98\)00064-1](https://doi.org/10.1016/S0925-4773(98)00064-1)
- Benson, S., Sucov, H., Stephens, L., Davidson, E. and Wilt, F. (1987). A lineage-specific gene encoding a major matrix protein of the sea urchin embryo spicule. I. Authentication of the cloned gene and its developmental expression. *Dev Biol*, 120, 2, 499-506. [https://doi.org/10.1016/0012-1606\(87\)90253-3](https://doi.org/10.1016/0012-1606(87)90253-3)
- Burke, R. D., Angerer, L. M., Elphick, M. R., Humphrey, G. W., Yaguchi, S., Kiyama, T., Liang, S., Mu, X., Agca, C., Klein, W. H., . . . Thorndyke, M. C. (2006). A genomic view of the sea urchin nervous system. *Dev Biol*, 300, 1, 434-460. <https://doi.org/10.1016/j.ydbio.2006.08.007>
- Burke, R. D., Osborne, L., Wang, D., Murabe, N., Yaguchi, S. and Nakajima, Y. (2006). Neuron-specific expression of a synaptotagmin gene in the sea urchin. *J Comp Neurol*, 496, 2, 244-251. <https://doi.org/10.1002/cne.20939>
- Buznikov, G. A., Peterson, R. E., Nikitina, L. A., Bezuglov, V. V. and Lauder, J. M. (2005). The pre-nervous serotonergic system of developing sea urchin embryos and larvae: Pharmacologic and immunocytochemical evidence. *Neurochem Res*, 30, 6-7, 825-837. <https://doi.org/10.1007/s11064-005-6876-6>
- Calestani, C., Rast, J. P. and Davidson, E. H. (2003). Isolation of pigment cell specific genes in the sea urchin embryo by differential macroarray screening. *Development*, 130, 19, 4587-4596. <https://doi.org/10.1242/dev.00647>
- Chen, J. H., Luo, Y. J. and Su, Y. H. (2011). The Dynamic Gene Expression Patterns of Transcription Factors Constituting the Sea Urchin Aboral Ectoderm Gene Regulatory Network. *Dev Dynam*, 240, 1, 250-260. <https://doi.org/10.1002/dvdy.22514>
- Davidson, P. L., Guo, H., Swart, J. S., Massri, A. J., Edgar, A., Wang, L., Berrio, A., Devens, H. R., Koop, D., Cisternas, P., . . . Wray, G. A. (2022). Recent reconfiguration of an ancient developmental gene regulatory network in *Heliocidaris* sea urchins. *Nat Ecol Evol*, 6, 12, 1907-1920. <https://doi.org/10.1038/s41559-022-01906-9>

- Duboc, V., Röttinger, E., Lapraz, F., Besnardeau, L. and Lepage, T. (2005). Left-right asymmetry in the sea urchin embryo is regulated by nodal signaling on the right side. *Dev Cell*, 9, 1, 147-158. <https://doi.org/10.1016/j.devcel.2005.05.008>
- Ettensohn, C. A., Illies, M. R., Oliveri, P. and De Jong, D. L. (2003). Alx1, a member of the Cart1/Alx3/Alx4 subfamily of Paired-class homeodomain proteins, is an essential component of the gene network controlling skeletogenic fate specification in the sea urchin embryo. *Development*, 130, 13, 2917-2928. <https://doi.org/10.1242/dev.00511>
- Ferkowicz, M. J. and Raff, R. A. (2001). Wnt gene expression in sea urchin development: Heterochronies associated with the evolution of developmental mode. *Evolution & Development*, 3, 1, 24-33. <https://doi.org/10.1046/j.1525-142x.2001.00084.x>
- Feuda, R. and Peter, I. S. (2022). Homologous gene regulatory networks control development of apical organs and brains in Bilateria. *Sci Adv*, 8, 44. <https://doi.org/10.1126/sciadv.abo2416>
- Garner, S., Zysk, I., Byrne, G., Kramer, M., Moller, D., Taylor, V. and Burke, R. D. (2016). Neurogenesis in sea urchin embryos and the diversity of deuterostome neurogenic mechanisms. *Development*, 143, 2, 286-297. <https://doi.org/10.1242/dev.124503>
- Howard-Ashby, M., Materna, S. C., Brown, C. T., Chen, L., Cameron, R. A. and Davidson, E. H. (2006). Identification and characterization of homeobox transcription factor genes in *Strongylocentrotus purpuratus*, and their expression in embryonic development. *Developmental Biology*, 300, 1, 74-89. <https://doi.org/10.1016/j.ydbio.2006.08.039>
- Katow, H., Suyemitsu, T., Ooka, S., Yaguchi, J., Jin-Nai, T., Kuwahara, I., Katow, T., Yaguchi, S. and Abe, H. (2010). Development of a dopaminergic system in sea urchin embryos and larvae. *J Exp Biol*, 213, 16, 2808-2819. <https://doi.org/10.1242/jeb.042150>
- Kawasaki, T., Mitsunaga-Nakatsubo, K., Takeda, K., Akasaka, K. and Shimada, H. (1999). Lim1 related homeobox gene (HpLim1) expressed in sea urchin embryos. *Dev Growth Differ*, 41, 3, 273-282. <https://doi.org/10.1046/j.1440-169X.1999.413432.x>
- Kenny, A. P., Oleksyn, D. W., Newman, L. A., Angerer, R. C. and Angerer, L. M. (2003). Tight regulation of SpSoxB factors is required for patterning and morphogenesis in sea urchin embryos. *Developmental Biology*, 261, 2, 412-425. [https://doi.org/10.1016/S0012-1606\(03\)00331-2](https://doi.org/10.1016/S0012-1606(03)00331-2)
- Koop, D., Cisternas, P., Morris, V. B., Strbenac, D., Yang, J. Y., Wray, G. A. and Byrne, M. (2017). Nodal and BMP expression during the transition to pentamery in the sea urchin *Heliocidaris erythrogramma*: insights into patterning the enigmatic echinoderm body plan. *BMC Dev Biol*, 17, 1, 4. <https://doi.org/10.1186/s12861-017-0145-1>
- Lapraz, F., Röttinger, E., Duboc, V., Range, R., Duloquin, L., Walton, K., Wu, S. Y., Bradham, C., Loza, M. A., Hibino, T., . . . Lepage, T. (2006). RTK and TGF- $\beta$  signaling pathways genes in the sea urchin genome. *Developmental Biology*, 300, 1, 132-152. <https://doi.org/10.1016/j.ydbio.2006.08.048>
- Lee, Y. H., Britten, R. J. and Davidson, E. H. (1999). SM37, a skeletogenic gene of the sea urchin embryo linked to the SM50 gene. *Dev Growth Differ*, 41, 3, 303-312. <https://doi.org/10.1046/j.1440-169X.1999.413429.x>
- Materna, S. C., Swartz, S. Z. and Smith, J. (2013). Notch and Nodal control forkhead factor expression in the specification of multipotent progenitors in sea urchin. *Development*, 140, 8, 1796-1806. <https://doi.org/10.1242/dev.091157>
- Nair, S. V., Del Valle, H., Gross, P. S., Terwilliger, D. P. and Smith, L. C. (2005). Microarray analysis of coelomocyte gene expression in response to LPS in the sea urchin.

- Identification of unexpected immune diversity in an invertebrate. *Physiol Genomics*, 22, 1, 33-47. <https://doi.org/10.1152/physiolgenomics.00052.2005>
- Oliveri, P., Walton, K. D., Davidson, E. H. and McClay, D. R. (2006). Repression of mesodermal fate by foxa, a key endoderm regulator of the sea urchin embryo. *Development*, 133, 21, 4173-4181. <https://doi.org/10.1242/dev.02577>
- Perillo, M., Paganos, P., Mattiello, T., Cocurullo, M., Oliveri, P. and Arnone, M. I. (2018). New Neuronal Subtypes With a "Pre-Pancreatic" Signature in the Sea Urchin. *Front Endocrinol*, 9. <https://doi.org/10.3389/fendo.2018.00650>
- Poustka, A. J., Kühn, A., Radosavljevic, V., Wellenreuther, R., Lehrach, H. and Panopoulou, G. (2004). On the origin of the chordate central nervous system: expression of oncut in the sea urchin embryo. *Evolution & Development*, 6, 4, 227-236. <https://doi.org/10.1111/j.1525-142X.2004.04028.x>
- Rho, H. K. and McClay, D. R. (2011). The control of foxN2/3 expression in sea urchin embryos and its function in the skeletogenic gene regulatory network. *Development*, 138, 5, 937-945. <https://doi.org/10.1242/dev.058396>
- Rizzo, F., Fernandez-Serra, M., Squarzoni, P., Archimandritis, A. and Arnone, M. I. (2006). Identification and developmental expression of the ets gene family in the sea urchin (*Strongylocentrotus purpuratus*). *Developmental Biology*, 300, 1, 35-48. <https://doi.org/10.1016/j.ydbio.2006.08.012>
- Robert, N., Lhomond, G., Schubert, M. and Croce, J. C. (2014). A comprehensive survey of wnt and frizzled expression in the sea urchin *Paracentrotus lividus*. *Genesis*, 52, 3, 235-250. <https://doi.org/10.1002/dvg.22754>
- Romano, L. A. and Wray, G. A. (2006). Endo16 is required for gastrulation in the sea urchin. *Dev Growth Differ*, 48, 8, 487-497. <https://doi.org/10.1111/j.1440-169x.2006.00884.x>
- Röttinger, E., Besnardeau, L. and Lepage, T. (2004). A Raf/MEK/ERK signaling pathway is required for development of the sea urchin embryo micromere lineage through phosphorylation of the transcription factor Ets. *Development*, 131, 9, 2233-2233. <https://doi.org/10.1242/dev.01000>
- Slota, L. A. and McClay, D. R. (2018). Identification of neural transcription factors required for the differentiation of three neuronal subtypes in the sea urchin embryo. *Developmental Biology*, 435, 2, 138-149. <https://doi.org/10.1016/j.ydbio.2017.12.015>
- Slota, L. A., Miranda, E. M. and McClay, D. R. (2019). Spatial and temporal patterns of gene expression during neurogenesis in the sea urchin. *Evodevo*, 10. <https://doi.org/10.1186/s13227-019-0115-8>
- Solek, C. M., Oliveri, P., Loza-Coll, M., Schrankel, C. S., Ho, E. C. H., Wang, G. Z. and Rast, J. R. (2013). An ancient role for Gata-1/2/3 and Scl transcription factor homologs in the development of immunocytes. *Developmental Biology*, 382, 1, 280-292. <https://doi.org/10.1016/j.ydbio.2013.06.019>
- Tu, Q., Brown, C. T., Davidson, E. H. and Oliveri, P. (2006). Sea urchin Forkhead gene family: Phylogeny and embryonic expression. *Developmental Biology*, 300, 1, 49-62. <https://doi.org/10.1016/j.ydbio.2006.09.031>
- Ullrich-Luter, E. M., Dupont, S., Arboleda, E., Hausen, H. and Arnone, M. I. (2011). Unique system of photoreceptors in sea urchin tube feet. *Proc Natl Acad Sci U S A*, 108, 20, 8367-8372. <https://doi.org/10.1073/pnas.1018495108>
- Wei, Z., Angerer, L. M. and Angerer, R. C. (2016). Neurogenic gene regulatory pathways in the sea urchin embryo. *Development*, 143, 2, 298-305. <https://doi.org/10.1242/dev.125989>

- Wei, Z., Yaguchi, J., Yaguchi, S., Angerer, R. C. and Angerer, L. M. (2009). The sea urchin animal pole domain is a Six3-dependent neurogenic patterning center. *Development*, 136, 7, 1179-1189. <https://doi.org/10.1242/dev.032300>
- Wessel, G. M., Zaydfudim, V., Hsu, Y. T. J., Laidlaw, M. and Brooks, J. M. (2000). Direct molecular interaction of a conserved yolk granule protein in sea urchins. *Dev Growth Differ*, 42, 5, 507-517. <https://doi.org/10.1046/j.1440-169x.2000.00534.x>
- Yaguchi, J., Angerer, L. M., Inaba, K. and Yaguchi, S. (2012). Zinc finger homeobox is required for the differentiation of serotonergic neurons in the sea urchin embryo. *Developmental Biology*, 363, 1, 74-83. <https://doi.org/10.1016/j.ydbio.2011.12.024>
- Yaguchi, J. and Yaguchi, S. (2021). Sea urchin larvae utilize light for regulating the pyloric opening. *Bmc Biology*, 19, 1. <https://doi.org/10.1186/s12915-021-00999-1>
- Yaguchi, S. and Katow, H. (2003). Expression of tryptophan 5-hydroxylase gene during sea urchin neurogenesis and role of serotonergic nervous system in larval behavior. *J Comp Neurol*, 466, 2, 219-229. <https://doi.org/10.1002/cne.10865>
- Yaguchi, S., Taniguchi, Y., Suzuki, H., Kamata, M. and Yaguchi, J. (2022). Planktonic sea urchin larvae change their swimming direction in response to strong photoirradiation. *Plos Genet*, 18, 2. <https://doi.org/10.1371/journal.pgen.1010033>
- Yaguchi, S., Yaguchi, J., Angerer, R. C. and Angerer, L. M. (2008). A Wnt-FoxQ2-nodal pathway links primary and secondary axis specification in sea urchin embryos. *Dev Cell*, 14, 1, 97-107. <https://doi.org/10.1016/j.devcel.2007.10.012>
